# Supplementary material for: Development of a deep neural network for automated electromyographic pattern classification
Source: Oxford University Press journal article supplement (doi:10.1242/jeb.198101), 2019-01-01
Supplement: jeb198101supp.pdf [file jeb198101supp.pdf]

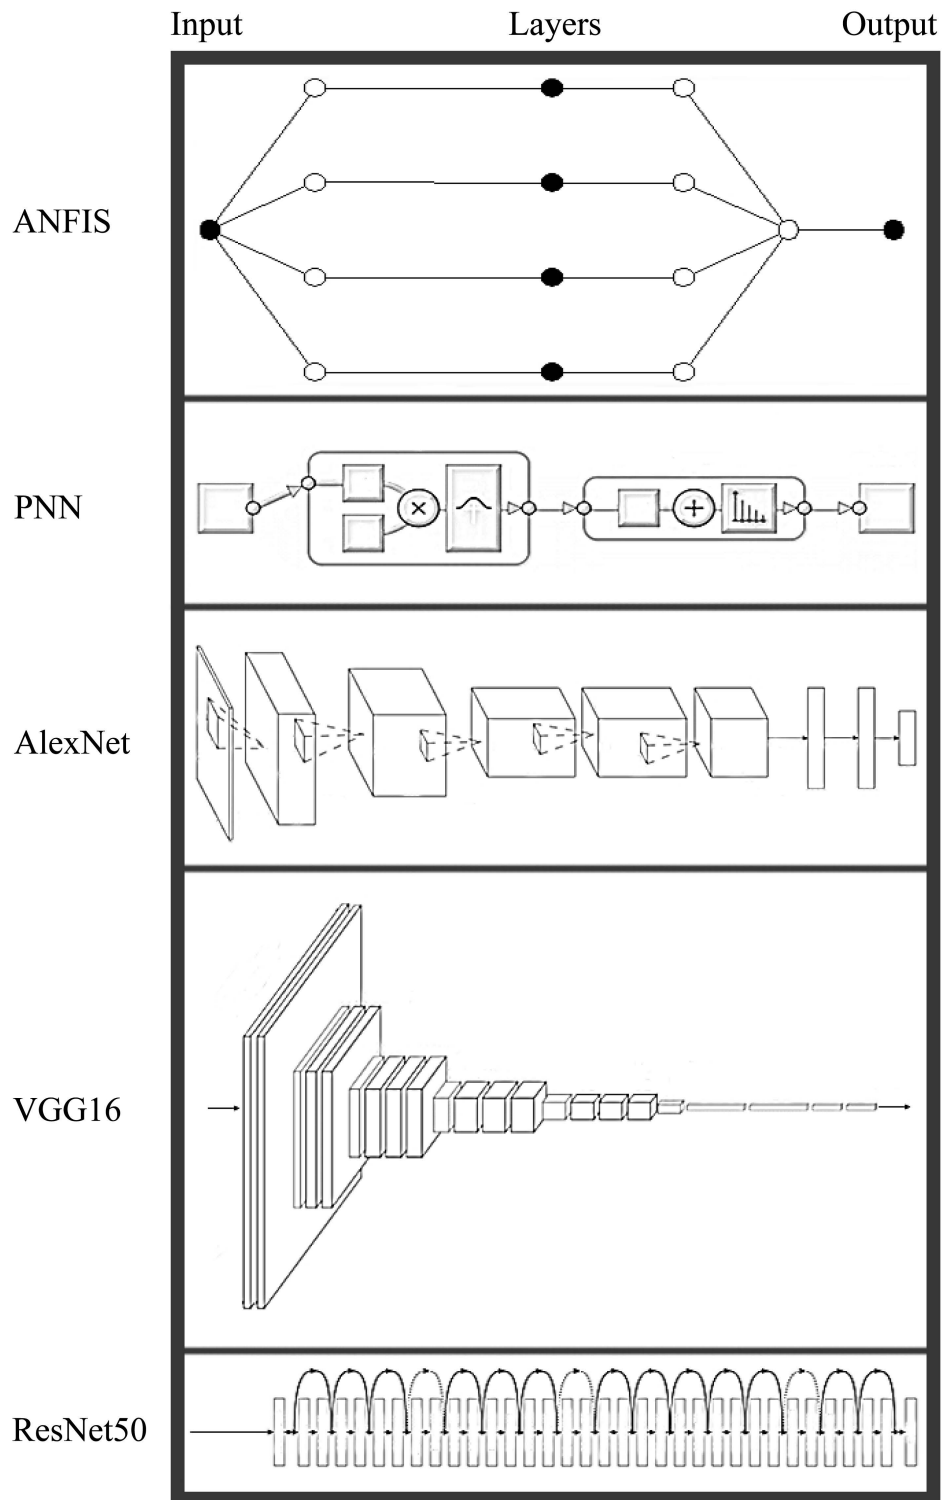

**Figure S1. Visualization of the five neural network architectures.** ANFIS - Adaptive neuro-fuzzy inference system; PNN - Pattern recognition neural network.
